# Supplementary material
Source: Springer Nature journal article supplement (https://www.springermedizin.de/resource/supplementary/12885_2011_2655_MOESM2_ESM.pdf/9461674)

V016

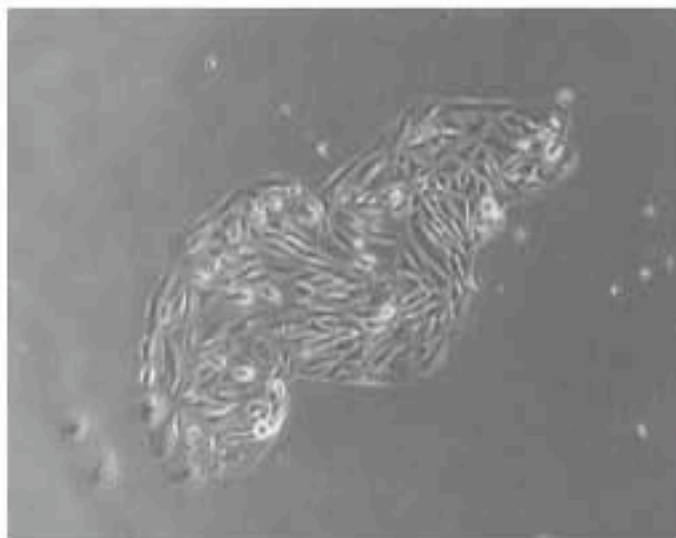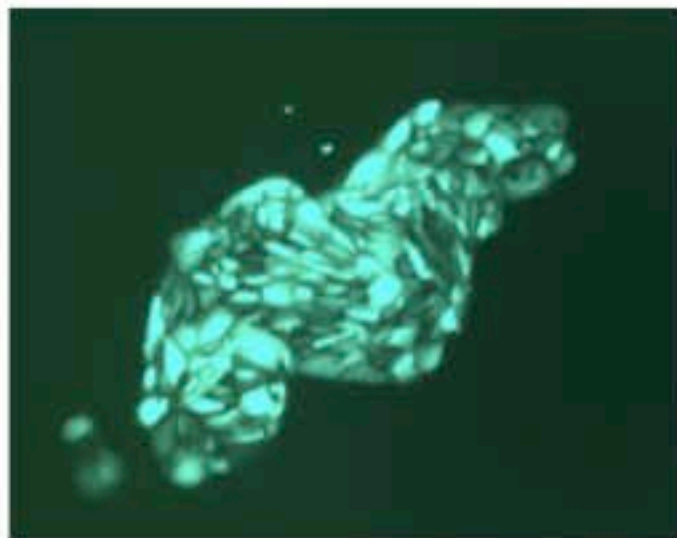

V017

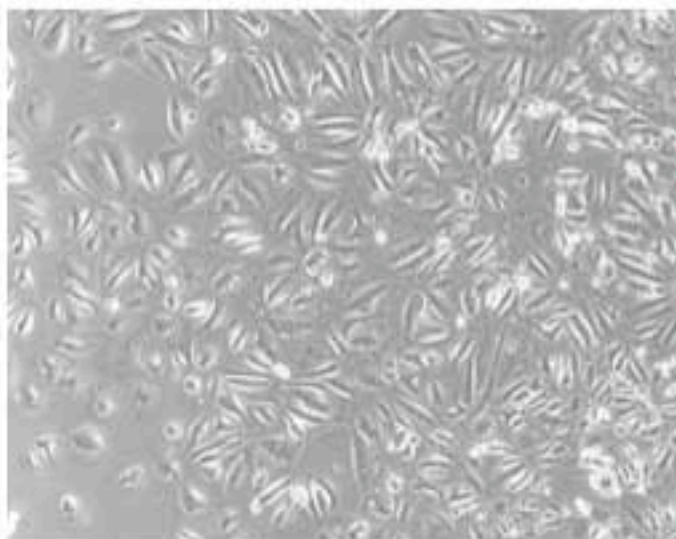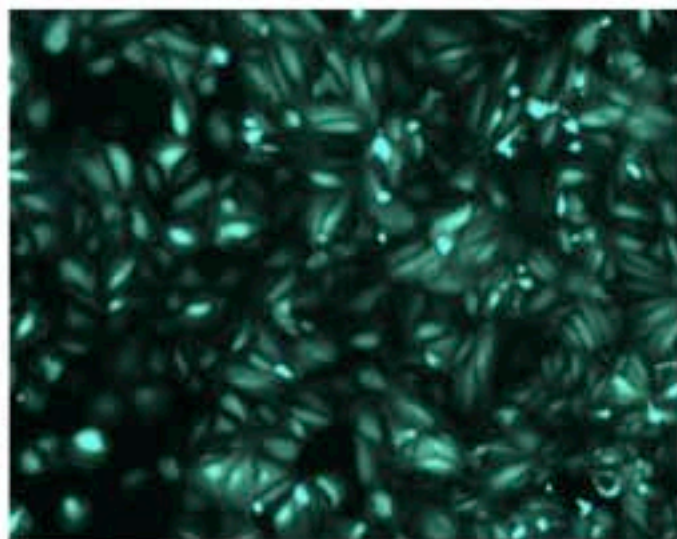

Supplement: MOESM2 [file 9461674]
